# Supplementary material for: A NiO-nanostructure-based electrochemical sensor functionalized with supramolecular structures for the ultra-sensitive detection of the endocrine disruptor bisphenol S in an aquatic environment
Source: Royal Society of Chemistry journal article supplement (doi:10.1039/d4cp00138a), 2024-01-01
Supplement: d4cp00138a1.pdf [file d4cp00138a1.pdf]

## SUPPLEMENTARY MATERIAL

### **A Supramolecular, Structural Functionalized NiO Nanostructured-Based Electrochemical Sensor for Ultra-Sensitive Detection of the Endocrine Disruptor Bisphenol-S from an Aquatic Environment**

Ali Hyder<sup>1,†</sup>, Akbar Ali<sup>2,3,†</sup>, Jamil Ahmed Buledi<sup>1</sup>, Roomia Memon<sup>4</sup>, Bader S. Al-Anzi<sup>5\*</sup>, Ayaz Ali Memon<sup>1\*</sup>, Mohsin Kazi<sup>6</sup>, Amber Rehana Solangi<sup>1</sup>, Jun Yang<sup>2,3\*</sup>, Khalid Hussain Thebo<sup>7\*</sup>

<sup>1</sup>*National Centre of Excellence in Analytical Chemistry, University of Sindh, Jamshoro 76080, Pakistan*

<sup>2</sup>*State Key Laboratory of Multi-phase Complex Systems, Institute of Process Engineering (IPE), Chinese Academy of Sciences, Beijing 100F190, China*

<sup>3</sup>*University of the Chinese Academy of Sciences, 19A Yuquan Road, Beijing 100049, China*

<sup>4</sup>*Sabancı University, SUNUM Nanotechnology Research and Application Center, Tuzla, 34956, Istanbul, Turkey*

<sup>5</sup>*Department of Environmental Sciences, Kuwait University, P.O. Box 5969, Safat, 13060, Kuwait*

<sup>6</sup>*Department of Pharmaceutics, College of Pharmacy, King Saud University, P.O. Box-2457, Riyadh 11451, Saudi Arabia.*

<sup>7</sup>*Institute of Metal Research (IMR), Chinese Academy of Science, 2 Wenhua Road, Shenyang, China*

Corresponding author Email: [bader.alanzi@ku.edu.kw](mailto:bader.alanzi@ku.edu.kw) (B.S.A.)\*

[ayazmemon33@usindh.edu.pk](mailto:ayazmemon33@usindh.edu.pk) (A.A.M.)\*

[jyang@ipe.ac.cn](mailto:jyang@ipe.ac.cn) (J.Y.)\*

[khalidthebo@yahoo.com](mailto:khalidthebo@yahoo.com) (K.H.T.)\*

† Equal Contribution

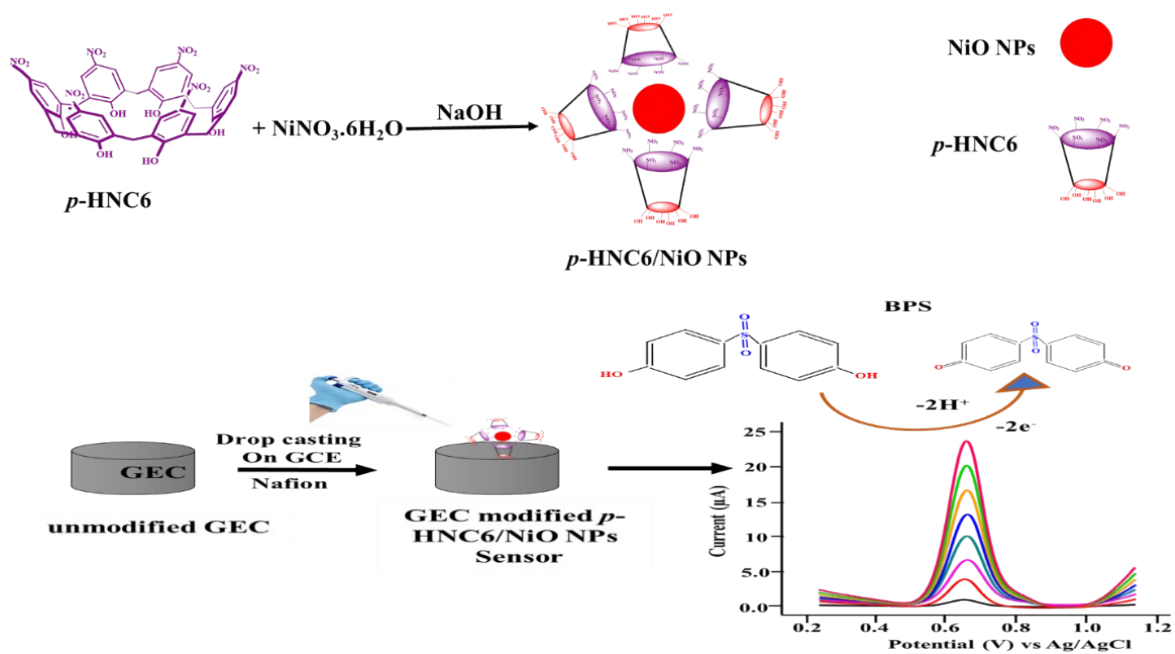

**Scheme S1:** Sensing mechanism based on the oxidation of BPS at the *p*-HNC6/NiO/GCE

**Table S1:** Real sample analysis of BPS in river water and industrial wastewater samples

| <b>Samples</b> | <b>Added Conc: (<math>\mu\text{M}</math>)</b> | <b>Found Conc: (<math>\mu\text{M}</math>)</b> | <b>% Recovery</b> |
|----------------|-----------------------------------------------|-----------------------------------------------|-------------------|
|                | 0                                             | 0                                             | 0                 |
| <b>River</b>   | 5                                             | 4.92                                          | 98.4              |
| <b>Water</b>   | 15                                            | 14.66                                         | 97.7              |
|                | 30                                            | 30.5                                          | 101.6             |
| <b>Waste</b>   | 0                                             | 0.86                                          | 0                 |
| <b>Water</b>   | 5                                             | 4.96                                          | 99.2              |
|                | 15                                            | 14.80                                         | 98.6              |
|                | 30                                            | 30.82                                         | 102.7             |
